# Supplementary material
Source: publisher figshare collection journal article supplement (https://acs.figshare.com/ndownloader/files/13613084)
Supplement: Supplementary file 1 [file 13613084]

## **Supporting information**

### **Methods**

#### **Effect of simulated intestinal media on the detection of H<sub>2</sub>O<sub>2</sub> by the AAP-DCHBS-HRP method**

Solutions of H<sub>2</sub>O<sub>2</sub> at final concentrations up to 15  $\mu$ M were prepared in different media by diluting a commercial solution of H<sub>2</sub>O<sub>2</sub>. AAP (0.1 mM final concentration), DCHBS (1 mM final concentration), HRP (3.6 units/mL, final concentration) were then added and incubated for 15 min at 25 °C. For each sample, absorbances at 515 nm and at 750 nm were read. The differences were calculated and subtracted by the value calculated in the sample not containing H<sub>2</sub>O<sub>2</sub>.

#### **Production of H<sub>2</sub>O<sub>2</sub> by DAO incubated with pancreatin**

DAO (0.15 mg of solid/mL) was incubated for 24 h at 37 °C in SIF pH 6.8 containing 1% pancreatin. Aliquots were withdrawn, supplemented or not with 2000 units/mL bovine liver catalase and incubated for 15 min at 37 °C. Samples were then diluted to a final concentration of  $0.6 \times 10^{-3}$  mg of solid/mL into a solution containing AAP, DCHBS, HRP at the concentrations indicated above and incubated for 15 min at 25 °C. Absorbance at 515 nm of the adduct generated from the reaction of DCHBS with AAP (oxidized by H<sub>2</sub>O<sub>2</sub> in the presence of HRP) was read, and after subtraction of the background absorbance (at 750 nm), it was corrected with the value obtained in the absence of DAO; the content of H<sub>2</sub>O<sub>2</sub> was calculated using  $2.6 \times 10^4 \text{ M}^{-1}\text{cm}^{-1}$  as the extinction coefficient.

**Figure captions**

**Figure S1: Effect of simulated intestinal media on the detection of H<sub>2</sub>O<sub>2</sub> by the AAP-DCHBS-HRP method.** Solutions of H<sub>2</sub>O<sub>2</sub> were prepared at the indicated final concentrations in PB at pH 7 (◆-◆), SIF at pH 6.8 (x-x), FaSSIF at pH 6.8 (●-●), FaSSIF at pH 6.5 (▲-▲), FeSSIF at pH 5.5 (■-■). AAP, DCHBS, HRP were then added and absorbance recorded and corrected as reported in Material and Methods (means +/- SD, n=3 different experiments).

**Figure S2: Michaelis-Menten kinetics for the oxidation of benzylamine by DAO in different simulated intestinal media.** DAO (0.18 mg of solid/mL final concentration) was added to PB at pH 7 (◆-◆), SIF at pH 6.8 (x-x), FAS SIF at pH 6.8 (●-●), FAS SIF at pH 6.5 (▲-▲), FES SIF at pH 5.5 (■-■) at 25 °C in the presence of benzylamine and the formation of benzaldehyde measured (means +/- SD, n=3 different experiments).

**Figure S3: Effect of CA on DAO activity in the presence of proteases.** DAO (0.15 mg of solid/mL final concentration) was incubated at 37 °C in SIF at pH 6.8 alone (control); in the presence of 3 mM CA; in the presence of 1% pancreatin; in the presence of 3 mM CA and 1% pancreatin; in the presence of 1% trypsin; in the presence of 3 mM CA and 1% trypsin (from the darkest to lightest shade). At the indicated times, aliquots were withdrawn, diluted in the incubation buffer and the activity measured by the AAP-DCHBS-HRP method. Reported values of DAO activity refer to the enzymatic activity in the incubation media (means +/- SD, n=3 different experiments).

**Figure S4: Production of H<sub>2</sub>O<sub>2</sub> during the incubation of pancreatin with DAO.** DAO (0.15 mg of solid/mL final concentration) was incubated at 37 °C in SIF pH 6.8 containing 1% pancreatin. After 24 h of the incubation samples were diluted in SIF at pH 6.8 to a final concentration of  $0.6 \times 10^{-3}$  mg of solid/mL, then added with AAP, DCHBS, HRP and H<sub>2</sub>O<sub>2</sub> concentration measured. Samples not incubated with bovine liver catalase (dark shade); samples incubated for 15 min with bovine liver catalase (2000 units/mL) (light shade) before dilution and addition of AAP, DCHBS and HRP. Reported values refer to DAO activity in the incubation media (means +/- SD, n=3 different experiments).

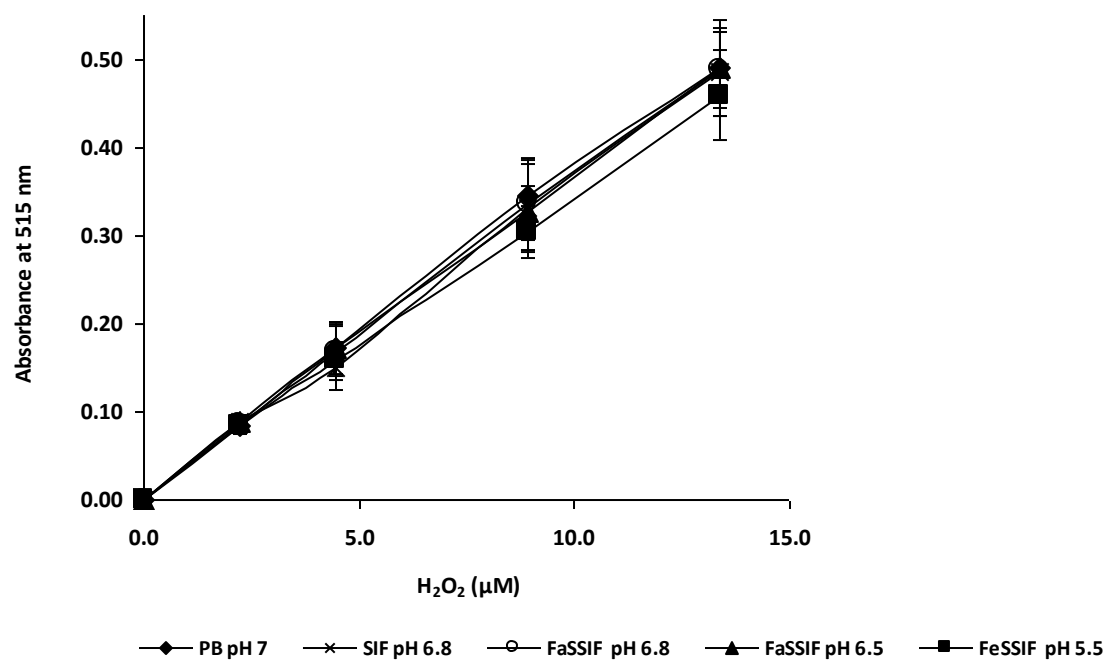

Fig. S1

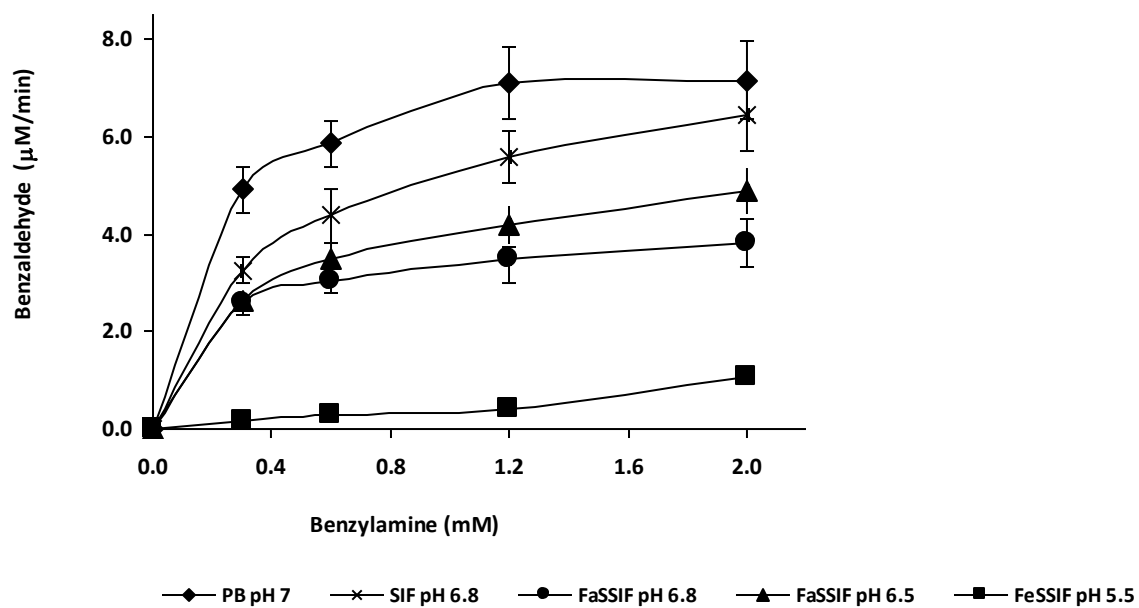

Fig. S2

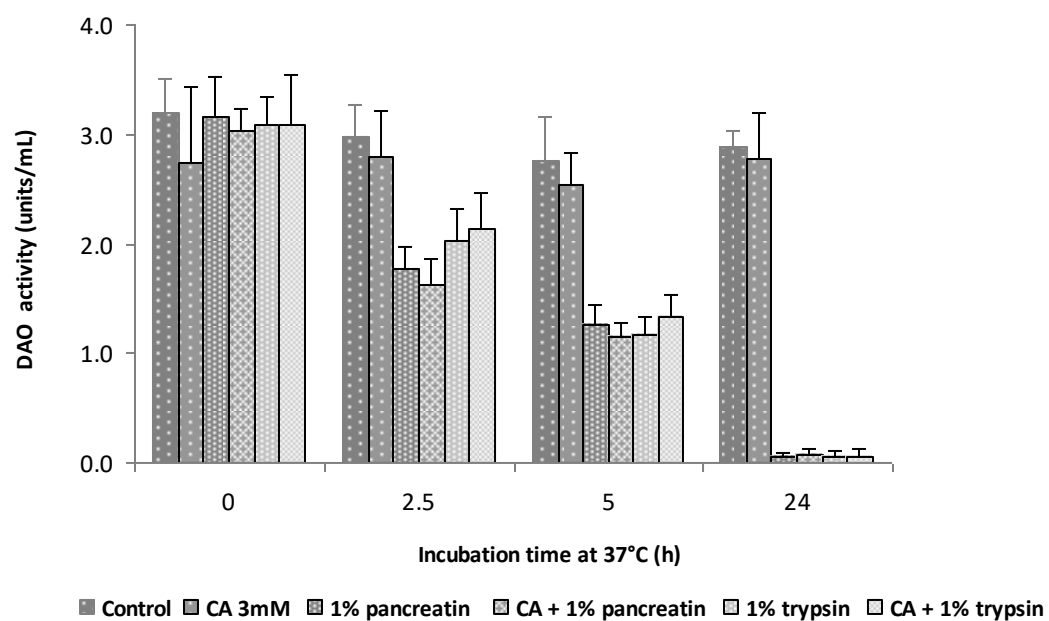

**Fig. S3**

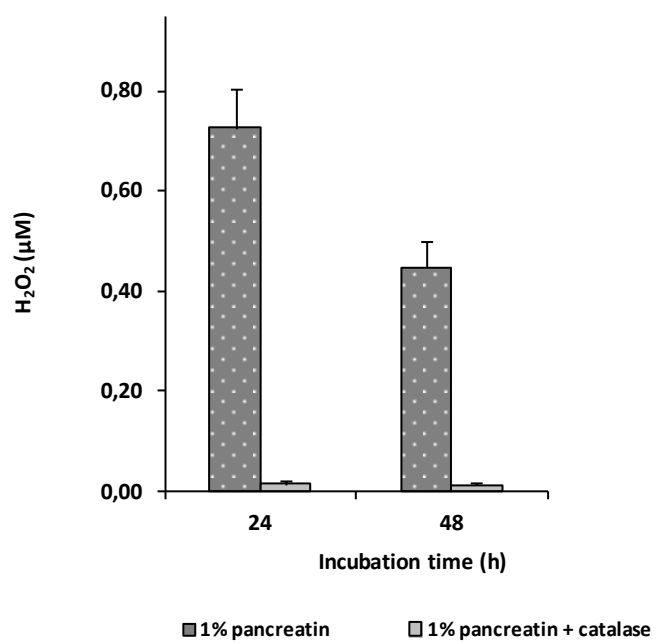

**Fig. S4**
